# Supplementary material
Source: PubMed Central journal article supplement (PMC4015233)
Supplement: mt20146x1.pdf [file mt20146x1.pdf]

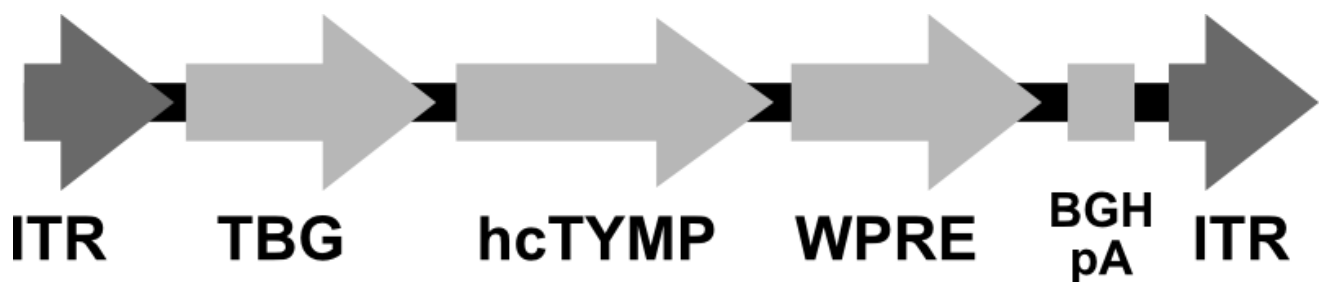

**Supplementary Figure S1.** Schematic representation of AAV2/8-TBG-hcTYMP. BGH pA, bovine growth hormone polyadenylation signal; hcTYMP, human thymidine phosphorylase coding sequence; ITR, inverted terminal repeats; TBG, thyroxine-binding globulin promoter; WPRE, woodchuck hepatitis virus posttranscriptional regulatory element.

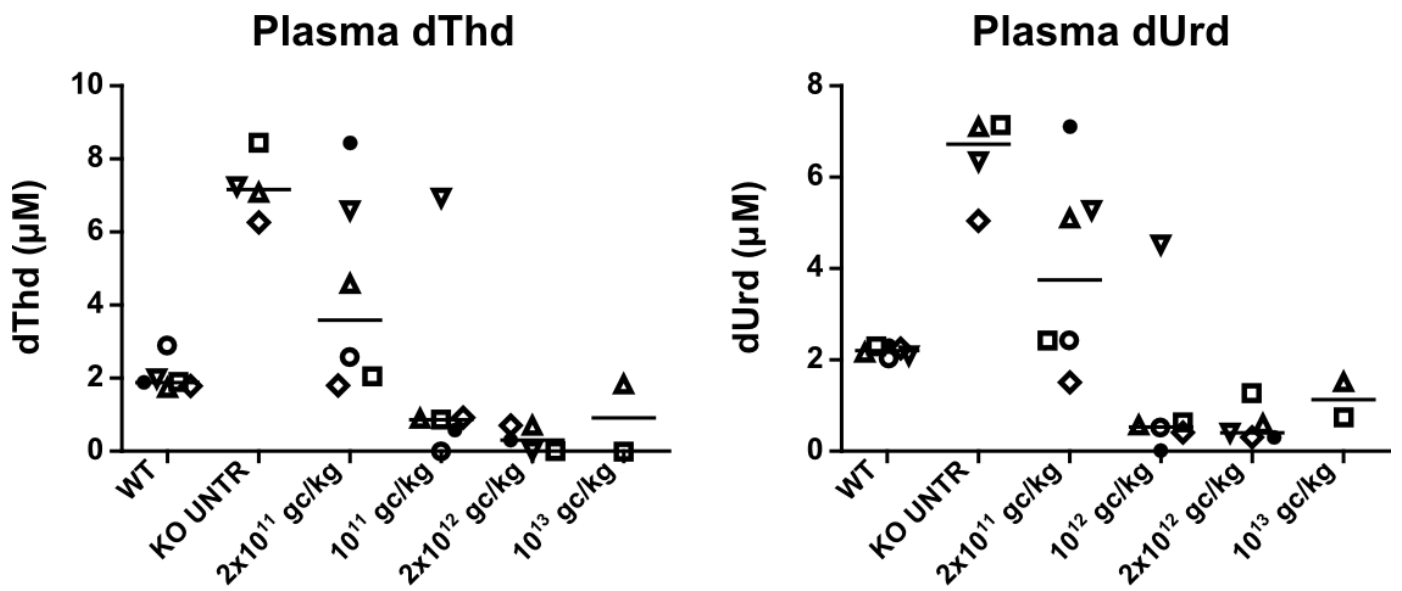

**Supplementary Figure S2.** Plasma nucleoside levels at the completion of the study. Plasma dThd and dUrd concentration were measured in samples from intracardiac blood 34 weeks after treatment. Horizontal lines represent median values.

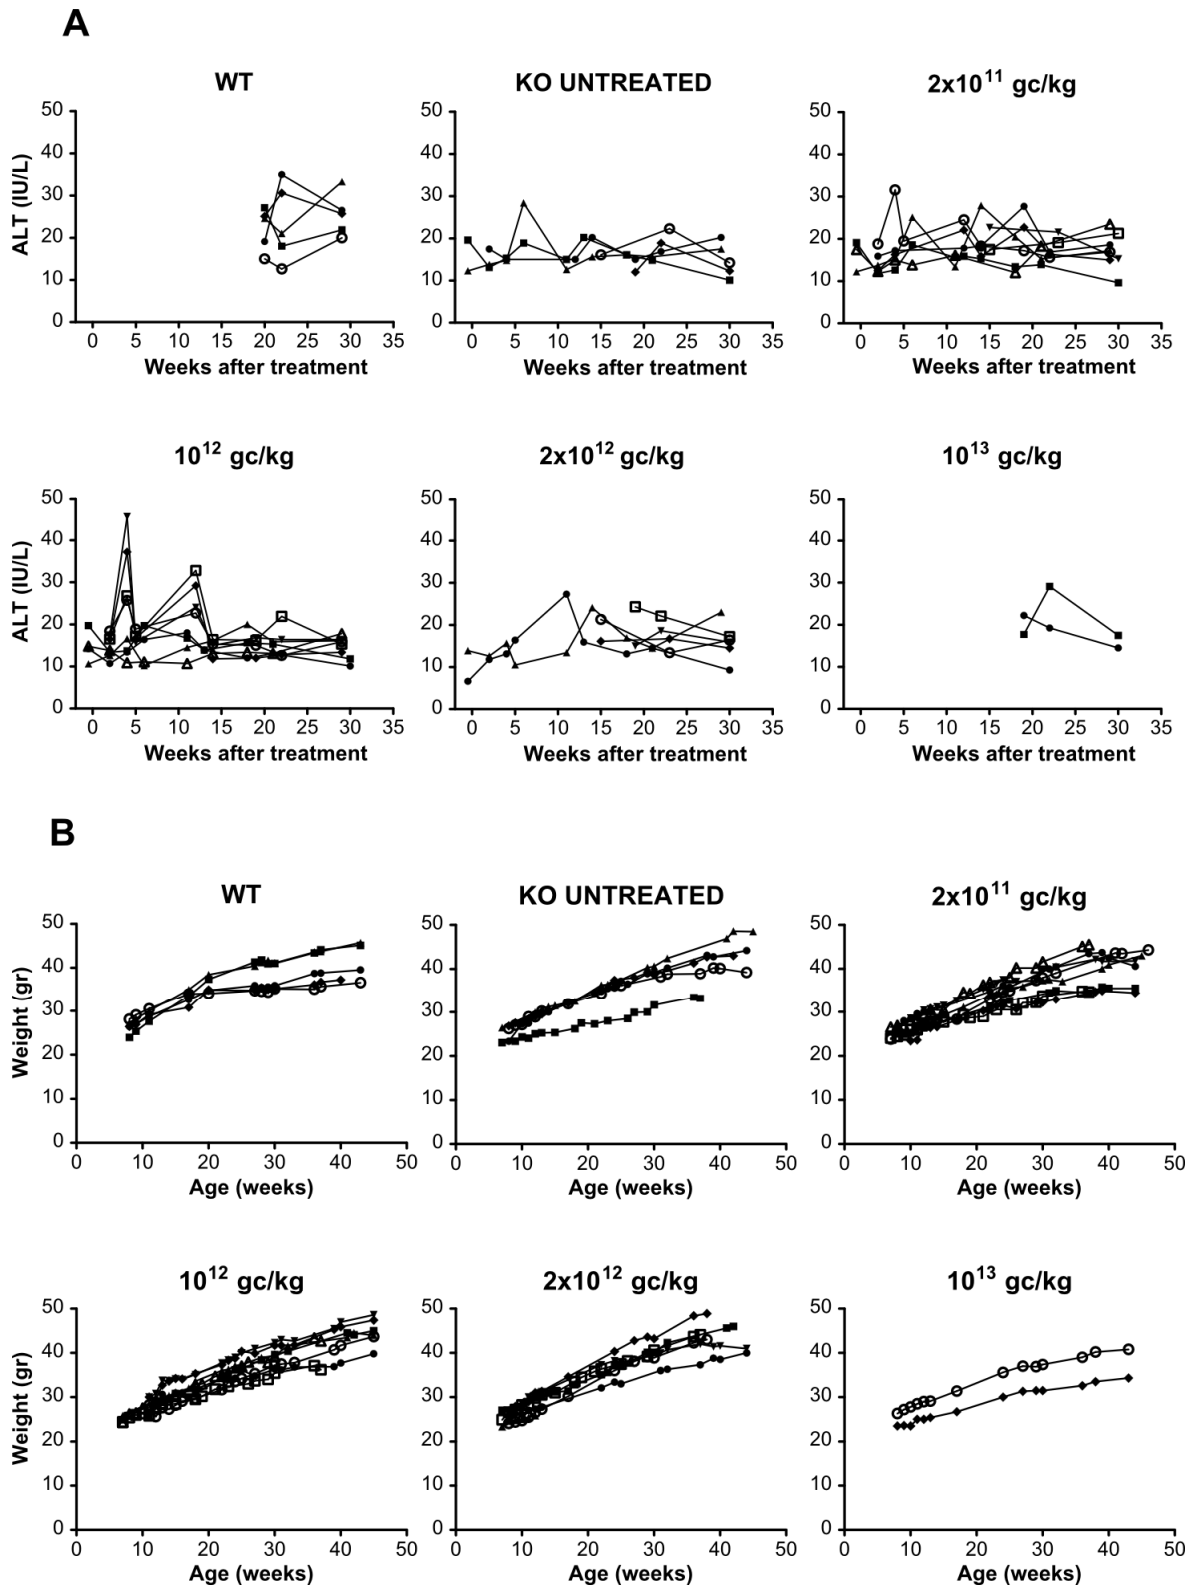

**Supplementary Figure S3.** Absence of liver toxicity in AAV treated mice. (A) Plasma alanine aminotransferase activity (ALT) measured before treatment and at different time-points after AAV injection. (B) Body weight of wt, and treated and non-treated KO mice
